# Supplementary material for: Prevalence of Occult Central Lymph Node Metastasis by Tumor Size in Papillary Thyroid Carcinoma: A Systematic Review and Meta-Analysis
Source: Curr Oncol. 2023 Aug 2;30(8):7335–50. doi: 10.3390/curroncol30080532 (PMC10453273; doi:10.3390/curroncol30080532)
Supplement: Supplementary file 1 [file curroncol-30-00532-s001.zip › Supplemental Figure 1 Baujat Leave one out.pdf]

## Supplemental Figure S1.

Baujat plots and leave-one-out statistical outputs

Less than 5mm

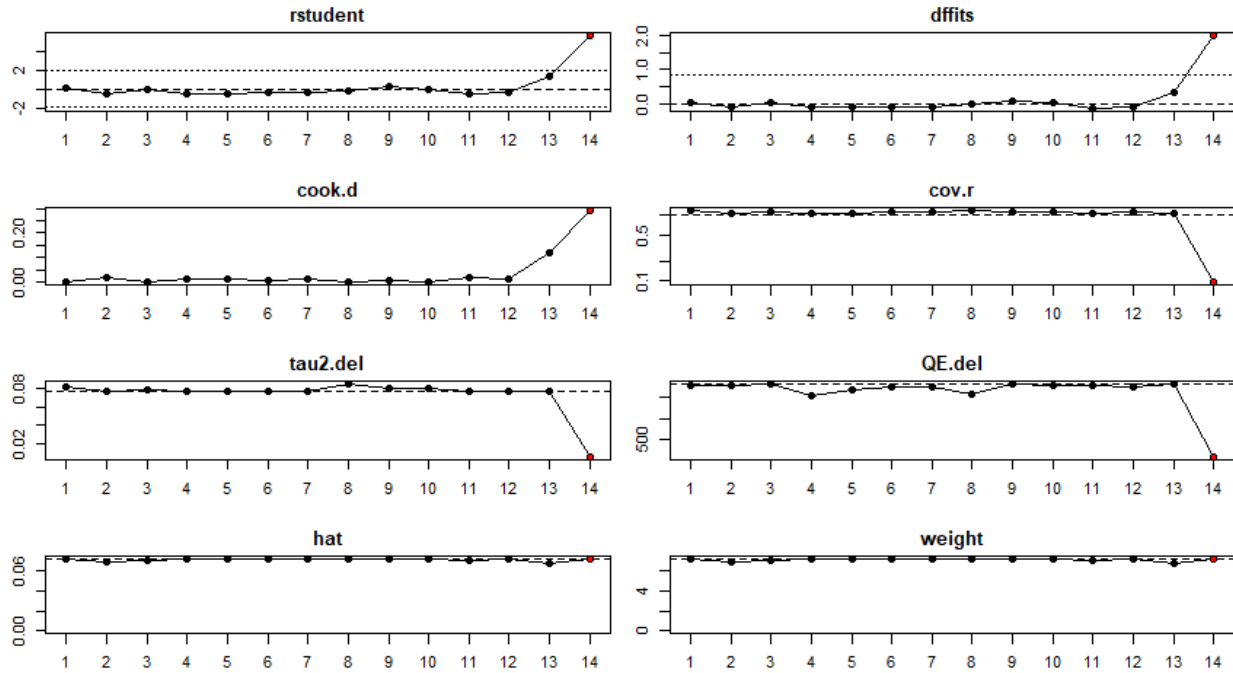

|    | rstudent | dffits  | cook.d | cov.r  | tau2.del | QE.del    | hat    | weight | dfbs    |
|----|----------|---------|--------|--------|----------|-----------|--------|--------|---------|
| 1  | 0.0979   | 0.0268  | 0.0008 | 1.1402 | 0.0812   | 1802.3588 | 0.0721 | 7.2076 | 0.0268  |
| 2  | -0.4680  | -0.1279 | 0.0164 | 1.0759 | 0.0767   | 1808.6248 | 0.0695 | 6.9496 | -0.1279 |
| 3  | 0.0084   | 0.0022  | 0.0000 | 1.0945 | 0.0780   | 1820.7700 | 0.0707 | 7.0709 | 0.0022  |
| 4  | -0.4362  | -0.1219 | 0.0148 | 1.0760 | 0.0765   | 1554.9362 | 0.0724 | 7.2446 | -0.1219 |
| 5  | -0.4481  | -0.1249 | 0.0157 | 1.0815 | 0.0769   | 1704.9657 | 0.0721 | 7.2093 | -0.1249 |
| 6  | -0.3242  | -0.0902 | 0.0082 | 1.0908 | 0.0776   | 1772.8179 | 0.0717 | 7.1672 | -0.0902 |
| 7  | -0.3928  | -0.1092 | 0.0120 | 1.0852 | 0.0772   | 1765.5174 | 0.0716 | 7.1649 | -0.1092 |
| 8  | -0.1499  | -0.0427 | 0.0020 | 1.1938 | 0.0850   | 1587.1703 | 0.0726 | 7.2554 | -0.0427 |
| 9  | 0.2394   | 0.0662  | 0.0046 | 1.1388 | 0.0811   | 1819.5882 | 0.0720 | 7.1962 | 0.0662  |
| 10 | 0.0050   | 0.0010  | 0.0000 | 1.1215 | 0.0798   | 1799.5871 | 0.0719 | 7.1905 | 0.0010  |
| 11 | -0.5045  | -0.1395 | 0.0194 | 1.0762 | 0.0766   | 1782.6440 | 0.0710 | 7.0982 | -0.1395 |
| 12 | -0.3961  | -0.1103 | 0.0123 | 1.0863 | 0.0773   | 1750.7264 | 0.0718 | 7.1833 | -0.1103 |
| 13 | 1.2808   | 0.3458  | 0.1204 | 1.0807 | 0.0772   | 1829.1770 | 0.0679 | 6.7909 | 0.3457  |
| 14 | 5.6535   | 2.0101  | 0.2935 | 0.0947 | 0.0055   | 90.2390   | 0.0727 | 7.2714 | 1.8423  |

inf

1  
2  
3  
4  
5  
6  
7  
8  
9  
10  
11  
12  
13  
14

\*

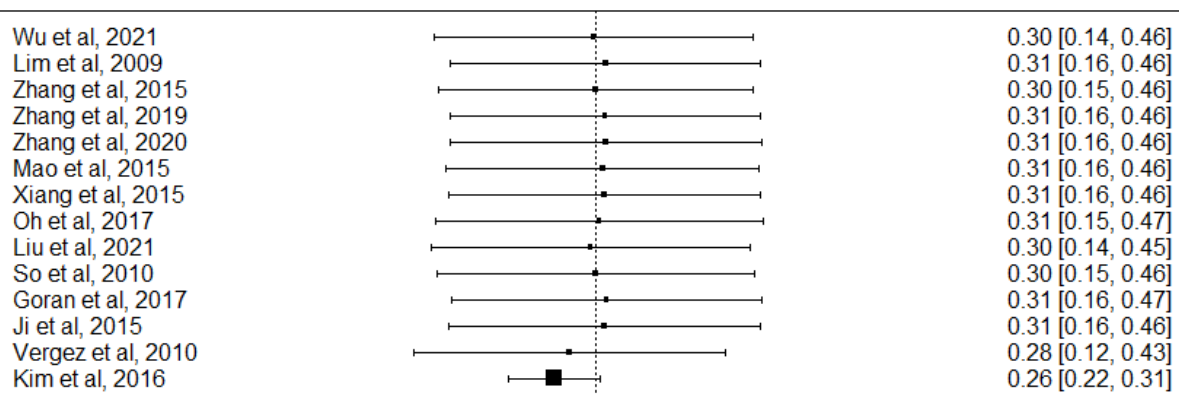

Summary proportions leaving out each study

| estimate | se      | zval     | pval    | ci.lb  | ci.ub  | Q      | Qp        | tau2   |        |
|----------|---------|----------|---------|--------|--------|--------|-----------|--------|--------|
| 1        | 0.3009  | 0.0797   | 3.7733  | 0.0002 | 0.1446 | 0.4572 | 1802.3588 | 0.0000 | 0.0812 |
| 2        | 0.3125  | 0.0775   | 4.0345  | 0.0001 | 0.1607 | 0.4643 | 1808.6248 | 0.0000 | 0.0767 |
| 3        | 0.3028  | 0.0781   | 3.8756  | 0.0001 | 0.1497 | 0.4559 | 1820.7700 | 0.0000 | 0.0780 |
| 4        | 0.3121  | 0.0775   | 4.0283  | 0.0001 | 0.1602 | 0.4639 | 1554.9362 | 0.0000 | 0.0765 |
| 5        | 0.3123  | 0.0777   | 4.0214  | 0.0001 | 0.1601 | 0.4645 | 1704.9657 | 0.0000 | 0.0769 |
| 6        | 0.3097  | 0.0780   | 3.9713  | 0.0001 | 0.1569 | 0.4626 | 1772.8179 | 0.0000 | 0.0776 |
| 7        | 0.3111  | 0.0778   | 3.9994  | 0.0001 | 0.1587 | 0.4636 | 1765.5174 | 0.0000 | 0.0772 |
| 8        | 0.3063  | 0.0816   | 3.7540  | 0.0002 | 0.1464 | 0.4662 | 1587.1703 | 0.0000 | 0.0850 |
| 9        | 0.2979  | 0.0797   | 3.7379  | 0.0002 | 0.1417 | 0.4541 | 1819.5882 | 0.0000 | 0.0811 |
| 10       | 0.3029  | 0.0791   | 3.8297  | 0.0001 | 0.1479 | 0.4579 | 1799.5871 | 0.0000 | 0.0798 |
| 11       | 0.3134  | 0.0775   | 4.0449  | 0.0001 | 0.1615 | 0.4652 | 1782.6440 | 0.0000 | 0.0766 |
| 12       | 0.3112  | 0.0778   | 3.9985  | 0.0001 | 0.1587 | 0.4638 | 1750.7264 | 0.0000 | 0.0773 |
| 13       | 0.2771  | 0.0776   | 3.5687  | 0.0004 | 0.1249 | 0.4292 | 1829.1770 | 0.0000 | 0.0772 |
| 14       | 0.2625  | 0.0230   | 11.4234 | 0.0000 | 0.2175 | 0.3075 | 90.2390   | 0.0000 | 0.0055 |
| I2       |         | H2       |         |        |        |        |           |        |        |
| 1        | 99.3342 | 150.1966 |         |        |        |        |           |        |        |
| 2        | 99.3365 | 150.7187 |         |        |        |        |           |        |        |
| 3        | 99.3409 | 151.7308 |         |        |        |        |           |        |        |
| 4        | 99.2283 | 129.5780 |         |        |        |        |           |        |        |
| 5        | 99.2962 | 142.0805 |         |        |        |        |           |        |        |
| 6        | 99.3231 | 147.7348 |         |        |        |        |           |        |        |
| 7        | 99.3203 | 147.1265 |         |        |        |        |           |        |        |
| 8        | 99.2439 | 132.2642 |         |        |        |        |           |        |        |
| 9        | 99.3405 | 151.6323 |         |        |        |        |           |        |        |
| 10       | 99.3332 | 149.9656 |         |        |        |        |           |        |        |
| 11       | 99.3268 | 148.5537 |         |        |        |        |           |        |        |
| 12       | 99.3146 | 145.8939 |         |        |        |        |           |        |        |
| 13       | 99.3440 | 152.4314 |         |        |        |        |           |        |        |
| 14       | 86.7020 | 7.5199   |         |        |        |        |           |        |        |

Less than 1cm

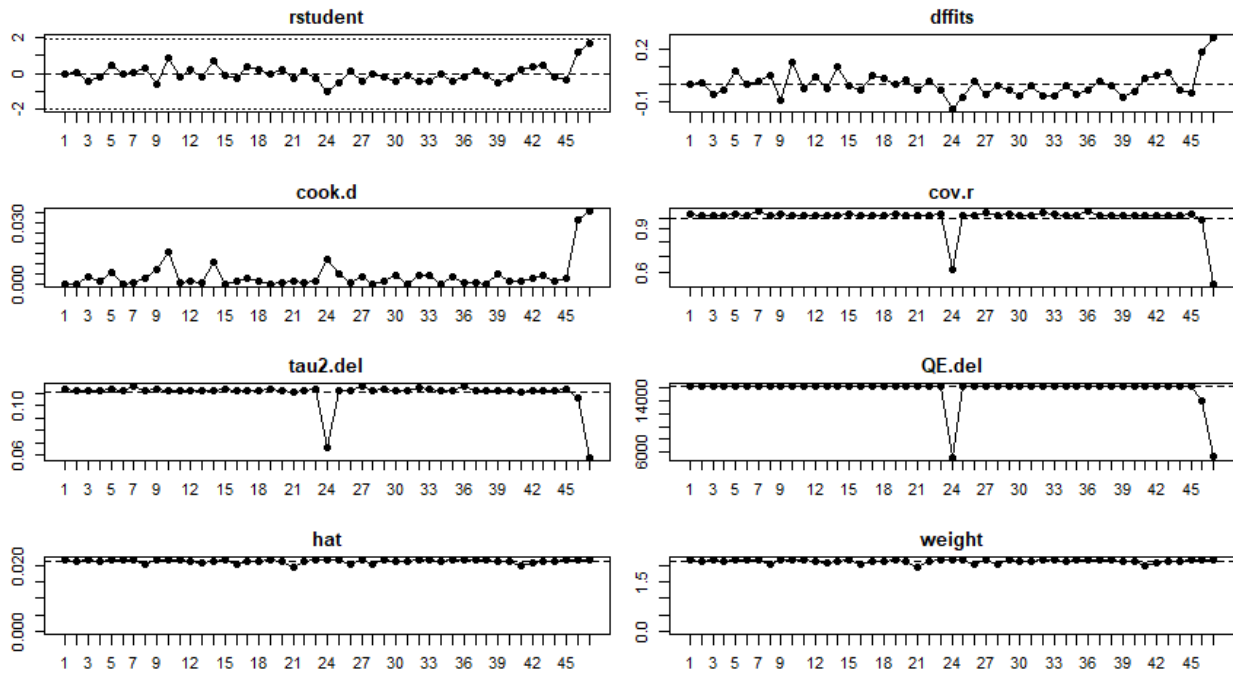

|    | rstudent | dffits  | cook.d | cov.r  | tau2.del | QE.del     | hat    | weight |
|----|----------|---------|--------|--------|----------|------------|--------|--------|
| 1  | 0.0102   | 0.0015  | 0.0000 | 1.0347 | 0.1130   | 16292.4374 | 0.0216 | 2.1577 |
| 2  | 0.0731   | 0.0108  | 0.0001 | 1.0255 | 0.1120   | 16294.0800 | 0.0213 | 2.1258 |
| 3  | -0.3938  | -0.0584 | 0.0034 | 1.0294 | 0.1124   | 16291.0683 | 0.0215 | 2.1483 |
| 4  | -0.2017  | -0.0298 | 0.0009 | 1.0272 | 0.1121   | 16296.2430 | 0.0214 | 2.1379 |
| 5  | 0.5081   | 0.0755  | 0.0058 | 1.0346 | 0.1129   | 16202.0926 | 0.0216 | 2.1620 |
| 6  | -0.0005  | -0.0001 | 0.0000 | 1.0302 | 0.1125   | 16294.1713 | 0.0215 | 2.1500 |
| 7  | 0.0927   | 0.0137  | 0.0002 | 1.0648 | 0.1163   | 16264.9447 | 0.0217 | 2.1678 |
| 8  | 0.3458   | 0.0500  | 0.0025 | 1.0221 | 0.1117   | 16292.2683 | 0.0205 | 2.0462 |
| 9  | -0.5739  | -0.0853 | 0.0074 | 1.0341 | 0.1129   | 16267.4082 | 0.0216 | 2.1587 |
| 10 | 0.8484   | 0.1258  | 0.0159 | 1.0246 | 0.1118   | 16186.9295 | 0.0215 | 2.1524 |
| 11 | -0.1809  | -0.0268 | 0.0007 | 1.0302 | 0.1125   | 16296.3190 | 0.0215 | 2.1497 |
| 12 | 0.2652   | 0.0390  | 0.0015 | 1.0242 | 0.1118   | 16290.2261 | 0.0211 | 2.1122 |
| 13 | -0.1548  | -0.0227 | 0.0005 | 1.0239 | 0.1118   | 16296.4022 | 0.0210 | 2.0985 |
| 14 | 0.6964   | 0.1029  | 0.0106 | 1.0243 | 0.1118   | 16252.2026 | 0.0214 | 2.1372 |
| 15 | -0.0580  | -0.0087 | 0.0001 | 1.0368 | 0.1132   | 16294.8810 | 0.0216 | 2.1596 |
| 16 | -0.2249  | -0.0325 | 0.0011 | 1.0224 | 0.1117   | 16296.3011 | 0.0205 | 2.0490 |
| 17 | 0.3484   | 0.0515  | 0.0027 | 1.0263 | 0.1120   | 16280.5851 | 0.0214 | 2.1382 |
| 18 | 0.2421   | 0.0358  | 0.0013 | 1.0266 | 0.1121   | 16286.7382 | 0.0214 | 2.1377 |
| 19 | 0.0104   | 0.0015  | 0.0000 | 1.0350 | 0.1130   | 16292.3482 | 0.0216 | 2.1580 |
| 20 | 0.1879   | 0.0277  | 0.0008 | 1.0252 | 0.1119   | 16291.2586 | 0.0212 | 2.1243 |
| 21 | -0.2203  | -0.0312 | 0.0010 | 1.0209 | 0.1116   | 16296.3447 | 0.0197 | 1.9655 |
| 22 | 0.1047   | 0.0155  | 0.0002 | 1.0269 | 0.1121   | 16292.2816 | 0.0214 | 2.1379 |
| 23 | -0.2222  | -0.0330 | 0.0011 | 1.0376 | 0.1133   | 16295.4786 | 0.0216 | 2.1601 |
| 24 | -0.9557  | -0.1425 | 0.0120 | 0.6117 | 0.0658   | 5184.0109  | 0.0217 | 2.1718 |
| 25 | -0.4845  | -0.0718 | 0.0052 | 1.0285 | 0.1123   | 16287.1550 | 0.0215 | 2.1462 |
| 26 | 0.1275   | 0.0183  | 0.0003 | 1.0217 | 0.1117   | 16295.3734 | 0.0202 | 2.0159 |
| 27 | -0.3858  | -0.0575 | 0.0034 | 1.0603 | 0.1158   | 16269.8901 | 0.0217 | 2.1673 |
| 28 | -0.0414  | -0.0060 | 0.0000 | 1.0224 | 0.1117   | 16296.2054 | 0.0205 | 2.0487 |
| 29 | -0.2007  | -0.0298 | 0.0009 | 1.0375 | 0.1133   | 16295.9586 | 0.0216 | 2.1600 |
| 30 | -0.4510  | -0.0661 | 0.0044 | 1.0240 | 0.1118   | 16293.5675 | 0.0210 | 2.1039 |
| 31 | -0.0638  | -0.0094 | 0.0001 | 1.0260 | 0.1120   | 16296.0212 | 0.0213 | 2.1294 |
| 32 | -0.4179  | -0.0622 | 0.0040 | 1.0487 | 0.1145   | 16272.5597 | 0.0217 | 2.1654 |
| 33 | -0.4316  | -0.0641 | 0.0042 | 1.0345 | 0.1129   | 16284.1741 | 0.0216 | 2.1581 |
| 34 | -0.0442  | -0.0065 | 0.0000 | 1.0258 | 0.1120   | 16295.8486 | 0.0213 | 2.1279 |
| 35 | -0.3888  | -0.0576 | 0.0033 | 1.0296 | 0.1124   | 16291.1581 | 0.0215 | 2.1489 |
| 36 | -0.1947  | -0.0290 | 0.0009 | 1.0648 | 0.1163   | 16295.3588 | 0.0217 | 2.1676 |

|    |         |         |        |        |        |            |        |        |
|----|---------|---------|--------|--------|--------|------------|--------|--------|
| 37 | 0.1272  | 0.0189  | 0.0004 | 1.0325 | 0.1127 | 16286.3059 | 0.0216 | 2.1554 |
| 38 | -0.0667 | -0.0099 | 0.0001 | 1.0323 | 0.1127 | 16295.5319 | 0.0215 | 2.1542 |
| 39 | -0.4789 | -0.0707 | 0.0050 | 1.0264 | 0.1120 | 16290.1805 | 0.0214 | 2.1350 |
| 40 | -0.2540 | -0.0373 | 0.0014 | 1.0246 | 0.1119 | 16296.0205 | 0.0211 | 2.1122 |
| 41 | 0.2379  | 0.0338  | 0.0011 | 1.0210 | 0.1116 | 16294.7926 | 0.0198 | 1.9772 |
| 42 | 0.3619  | 0.0527  | 0.0028 | 1.0228 | 0.1117 | 16290.4782 | 0.0208 | 2.0779 |
| 43 | 0.4444  | 0.0653  | 0.0043 | 1.0239 | 0.1118 | 16283.2972 | 0.0211 | 2.1143 |
| 44 | -0.2027 | -0.0299 | 0.0009 | 1.0260 | 0.1120 | 16296.2703 | 0.0213 | 2.1289 |
| 45 | -0.3425 | -0.0509 | 0.0026 | 1.0345 | 0.1129 | 16290.8863 | 0.0216 | 2.1577 |
| 46 | 1.2136  | 0.1810  | 0.0313 | 0.9781 | 0.1066 | 13999.9303 | 0.0217 | 2.1702 |
| 47 | 1.7119  | 0.2623  | 0.0355 | 0.5375 | 0.0576 | 5469.3234  | 0.0217 | 2.1715 |

dfbs inf

|    |         |
|----|---------|
| 1  | 0.0015  |
| 2  | 0.0108  |
| 3  | -0.0584 |
| 4  | -0.0298 |
| 5  | 0.0755  |
| 6  | -0.0001 |
| 7  | 0.0137  |
| 8  | 0.0500  |
| 9  | -0.0853 |
| 10 | 0.1258  |
| 11 | -0.0268 |
| 12 | 0.0390  |
| 13 | -0.0227 |
| 14 | 0.1029  |
| 15 | -0.0087 |
| 16 | -0.0325 |
| 17 | 0.0515  |
| 18 | 0.0358  |
| 19 | 0.0015  |
| 20 | 0.0277  |
| 21 | -0.0312 |
| 22 | 0.0155  |
| 23 | -0.0330 |
| 24 | -0.1416 |
| 25 | -0.0718 |
| 26 | 0.0183  |
| 27 | -0.0575 |
| 28 | -0.0060 |
| 29 | -0.0298 |
| 30 | -0.0661 |
| 31 | -0.0094 |
| 32 | -0.0622 |
| 33 | -0.0641 |
| 34 | -0.0065 |
| 35 | -0.0576 |
| 36 | -0.0291 |
| 37 | 0.0189  |
| 38 | -0.0099 |
| 39 | -0.0707 |
| 40 | -0.0373 |
| 41 | 0.0338  |
| 42 | 0.0527  |
| 43 | 0.0653  |
| 44 | -0.0299 |
| 45 | -0.0509 |
| 46 | 0.1809  |
| 47 | 0.2600  |

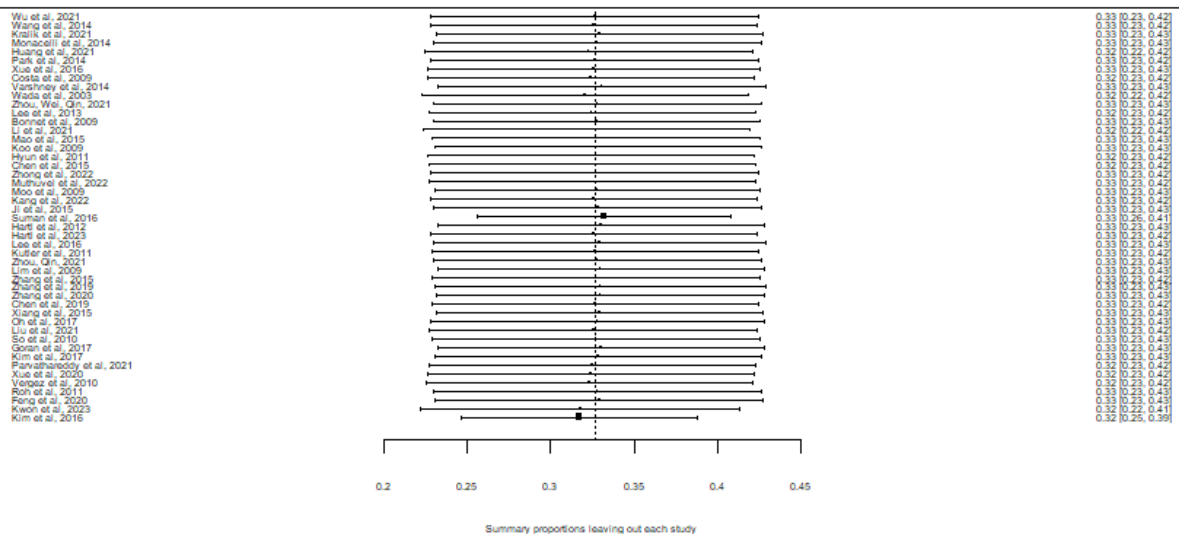

|    | estimate | se     | zval   | pval   | ci.lb  | ci.ub  | Q          | Qp     | tau2   |
|----|----------|--------|--------|--------|--------|--------|------------|--------|--------|
| 1  | 0.3265   | 0.0501 | 6.5217 | 0.0000 | 0.2284 | 0.4247 | 16292.4374 | 0.0000 | 0.1130 |
| 2  | 0.3261   | 0.0498 | 6.5417 | 0.0000 | 0.2284 | 0.4238 | 16294.0800 | 0.0000 | 0.1120 |
| 3  | 0.3295   | 0.0499 | 6.5978 | 0.0000 | 0.2316 | 0.4274 | 16291.0683 | 0.0000 | 0.1124 |
| 4  | 0.3281   | 0.0499 | 6.5765 | 0.0000 | 0.2303 | 0.4258 | 16296.2430 | 0.0000 | 0.1121 |
| 5  | 0.3229   | 0.0501 | 6.4488 | 0.0000 | 0.2247 | 0.4210 | 16202.0926 | 0.0000 | 0.1129 |
| 6  | 0.3266   | 0.0500 | 6.5376 | 0.0000 | 0.2287 | 0.4245 | 16294.1713 | 0.0000 | 0.1125 |
| 7  | 0.3259   | 0.0508 | 6.4167 | 0.0000 | 0.2264 | 0.4255 | 16264.9447 | 0.0000 | 0.1163 |
| 8  | 0.3241   | 0.0498 | 6.5139 | 0.0000 | 0.2266 | 0.4217 | 16292.2683 | 0.0000 | 0.1117 |
| 9  | 0.3308   | 0.0501 | 6.6095 | 0.0000 | 0.2327 | 0.4289 | 16267.4082 | 0.0000 | 0.1129 |
| 10 | 0.3204   | 0.0498 | 6.4310 | 0.0000 | 0.2228 | 0.4180 | 16186.9295 | 0.0000 | 0.1118 |
| 11 | 0.3279   | 0.0500 | 6.5641 | 0.0000 | 0.2300 | 0.4258 | 16296.3190 | 0.0000 | 0.1125 |
| 12 | 0.3247   | 0.0498 | 6.5179 | 0.0000 | 0.2270 | 0.4223 | 16290.2261 | 0.0000 | 0.1118 |
| 13 | 0.3277   | 0.0498 | 6.5799 | 0.0000 | 0.2301 | 0.4253 | 16296.4022 | 0.0000 | 0.1118 |
| 14 | 0.3215   | 0.0498 | 6.4543 | 0.0000 | 0.2239 | 0.4192 | 16252.2026 | 0.0000 | 0.1118 |
| 15 | 0.3270   | 0.0501 | 6.5251 | 0.0000 | 0.2288 | 0.4253 | 16294.8810 | 0.0000 | 0.1132 |
| 16 | 0.3282   | 0.0498 | 6.5946 | 0.0000 | 0.2307 | 0.4257 | 16296.3011 | 0.0000 | 0.1117 |
| 17 | 0.3241   | 0.0499 | 6.4990 | 0.0000 | 0.2263 | 0.4218 | 16280.5851 | 0.0000 | 0.1120 |
| 18 | 0.3248   | 0.0499 | 6.5136 | 0.0000 | 0.2271 | 0.4226 | 16286.7382 | 0.0000 | 0.1121 |
| 19 | 0.3265   | 0.0501 | 6.5209 | 0.0000 | 0.2284 | 0.4247 | 16292.3482 | 0.0000 | 0.1130 |
| 20 | 0.3252   | 0.0498 | 6.5260 | 0.0000 | 0.2276 | 0.4229 | 16291.2586 | 0.0000 | 0.1119 |
| 21 | 0.3281   | 0.0497 | 6.5980 | 0.0000 | 0.2307 | 0.4256 | 16296.3447 | 0.0000 | 0.1116 |
| 22 | 0.3258   | 0.0499 | 6.5325 | 0.0000 | 0.2281 | 0.4236 | 16292.2816 | 0.0000 | 0.1121 |
| 23 | 0.3282   | 0.0501 | 6.5468 | 0.0000 | 0.2300 | 0.4265 | 16295.4786 | 0.0000 | 0.1133 |
| 24 | 0.3320   | 0.0385 | 8.6240 | 0.0000 | 0.2565 | 0.4074 | 5184.0109  | 0.0000 | 0.0658 |
| 25 | 0.3301   | 0.0499 | 6.6140 | 0.0000 | 0.2323 | 0.4280 | 16287.1550 | 0.0000 | 0.1123 |
| 26 | 0.3257   | 0.0498 | 6.5466 | 0.0000 | 0.2282 | 0.4232 | 16295.3734 | 0.0000 | 0.1117 |
| 27 | 0.3295   | 0.0507 | 6.5009 | 0.0000 | 0.2301 | 0.4288 | 16269.8901 | 0.0000 | 0.1158 |
| 28 | 0.3269   | 0.0498 | 6.5684 | 0.0000 | 0.2294 | 0.4244 | 16296.2054 | 0.0000 | 0.1117 |
| 29 | 0.3281   | 0.0501 | 6.5439 | 0.0000 | 0.2298 | 0.4263 | 16295.9586 | 0.0000 | 0.1133 |
| 30 | 0.3299   | 0.0498 | 6.6227 | 0.0000 | 0.2322 | 0.4275 | 16293.5675 | 0.0000 | 0.1118 |
| 31 | 0.3271   | 0.0499 | 6.5601 | 0.0000 | 0.2293 | 0.4248 | 16296.0212 | 0.0000 | 0.1120 |
| 32 | 0.3297   | 0.0504 | 6.5409 | 0.0000 | 0.2309 | 0.4285 | 16272.5597 | 0.0000 | 0.1145 |
| 33 | 0.3298   | 0.0501 | 6.5871 | 0.0000 | 0.2317 | 0.4279 | 16284.1741 | 0.0000 | 0.1129 |
| 34 | 0.3269   | 0.0499 | 6.5578 | 0.0000 | 0.2292 | 0.4246 | 16295.8486 | 0.0000 | 0.1120 |
| 35 | 0.3294   | 0.0499 | 6.5965 | 0.0000 | 0.2316 | 0.4273 | 16291.1581 | 0.0000 | 0.1124 |
| 36 | 0.3281   | 0.0508 | 6.4590 | 0.0000 | 0.2285 | 0.4276 | 16295.3588 | 0.0000 | 0.1163 |
| 37 | 0.3257   | 0.0500 | 6.5116 | 0.0000 | 0.2276 | 0.4237 | 16286.3059 | 0.0000 | 0.1127 |

|    |        |        |        |        |        |        |            |        |        |
|----|--------|--------|--------|--------|--------|--------|------------|--------|--------|
| 38 | 0.3271 | 0.0500 | 6.5407 | 0.0000 | 0.2291 | 0.4251 | 16295.5319 | 0.0000 | 0.1127 |
| 39 | 0.3301 | 0.0499 | 6.6196 | 0.0000 | 0.2324 | 0.4278 | 16290.1805 | 0.0000 | 0.1120 |
| 40 | 0.3284 | 0.0498 | 6.5922 | 0.0000 | 0.2308 | 0.4261 | 16296.0205 | 0.0000 | 0.1119 |
| 41 | 0.3249 | 0.0497 | 6.5334 | 0.0000 | 0.2275 | 0.4224 | 16294.7926 | 0.0000 | 0.1116 |
| 42 | 0.3240 | 0.0498 | 6.5090 | 0.0000 | 0.2264 | 0.4216 | 16290.4782 | 0.0000 | 0.1117 |
| 43 | 0.3234 | 0.0498 | 6.4928 | 0.0000 | 0.2258 | 0.4210 | 16283.2972 | 0.0000 | 0.1118 |
| 44 | 0.3281 | 0.0499 | 6.5805 | 0.0000 | 0.2304 | 0.4258 | 16296.2703 | 0.0000 | 0.1120 |
| 45 | 0.3291 | 0.0501 | 6.5740 | 0.0000 | 0.2310 | 0.4272 | 16290.8863 | 0.0000 | 0.1129 |
| 46 | 0.3179 | 0.0487 | 6.5303 | 0.0000 | 0.2225 | 0.4133 | 13999.9303 | 0.0000 | 0.1066 |
| 47 | 0.3173 | 0.0361 | 8.7937 | 0.0000 | 0.2466 | 0.3880 | 5469.3234  | 0.0000 | 0.0576 |

|    | I2      | H2       |
|----|---------|----------|
| 1  | 99.7238 | 362.0542 |
| 2  | 99.7238 | 362.0907 |
| 3  | 99.7238 | 362.0237 |
| 4  | 99.7239 | 362.1387 |
| 5  | 99.7223 | 360.0465 |
| 6  | 99.7238 | 362.0927 |
| 7  | 99.7233 | 361.4432 |
| 8  | 99.7238 | 362.0504 |
| 9  | 99.7234 | 361.4980 |
| 10 | 99.7220 | 359.7095 |
| 11 | 99.7239 | 362.1404 |
| 12 | 99.7238 | 362.0050 |
| 13 | 99.7239 | 362.1423 |
| 14 | 99.7231 | 361.1601 |
| 15 | 99.7238 | 362.1085 |
| 16 | 99.7239 | 362.1400 |
| 17 | 99.7236 | 361.7908 |
| 18 | 99.7237 | 361.9275 |
| 19 | 99.7238 | 362.0522 |
| 20 | 99.7238 | 362.0280 |
| 21 | 99.7239 | 362.1410 |
| 22 | 99.7238 | 362.0507 |
| 23 | 99.7238 | 362.1217 |
| 24 | 99.1319 | 115.2002 |
| 25 | 99.7237 | 361.9368 |
| 26 | 99.7238 | 362.1194 |
| 27 | 99.7234 | 361.5531 |
| 28 | 99.7239 | 362.1379 |
| 29 | 99.7239 | 362.1324 |
| 30 | 99.7238 | 362.0793 |
| 31 | 99.7239 | 362.1338 |
| 32 | 99.7235 | 361.6124 |
| 33 | 99.7237 | 361.8705 |
| 34 | 99.7239 | 362.1300 |
| 35 | 99.7238 | 362.0257 |
| 36 | 99.7238 | 362.1191 |
| 37 | 99.7237 | 361.9179 |
| 38 | 99.7239 | 362.1229 |
| 39 | 99.7238 | 362.0040 |
| 40 | 99.7239 | 362.1338 |
| 41 | 99.7238 | 362.1065 |
| 42 | 99.7238 | 362.0106 |
| 43 | 99.7236 | 361.8510 |
| 44 | 99.7239 | 362.1393 |
| 45 | 99.7238 | 362.0197 |
| 46 | 99.6786 | 311.1096 |
| 47 | 99.1772 | 121.5405 |

1-2cm

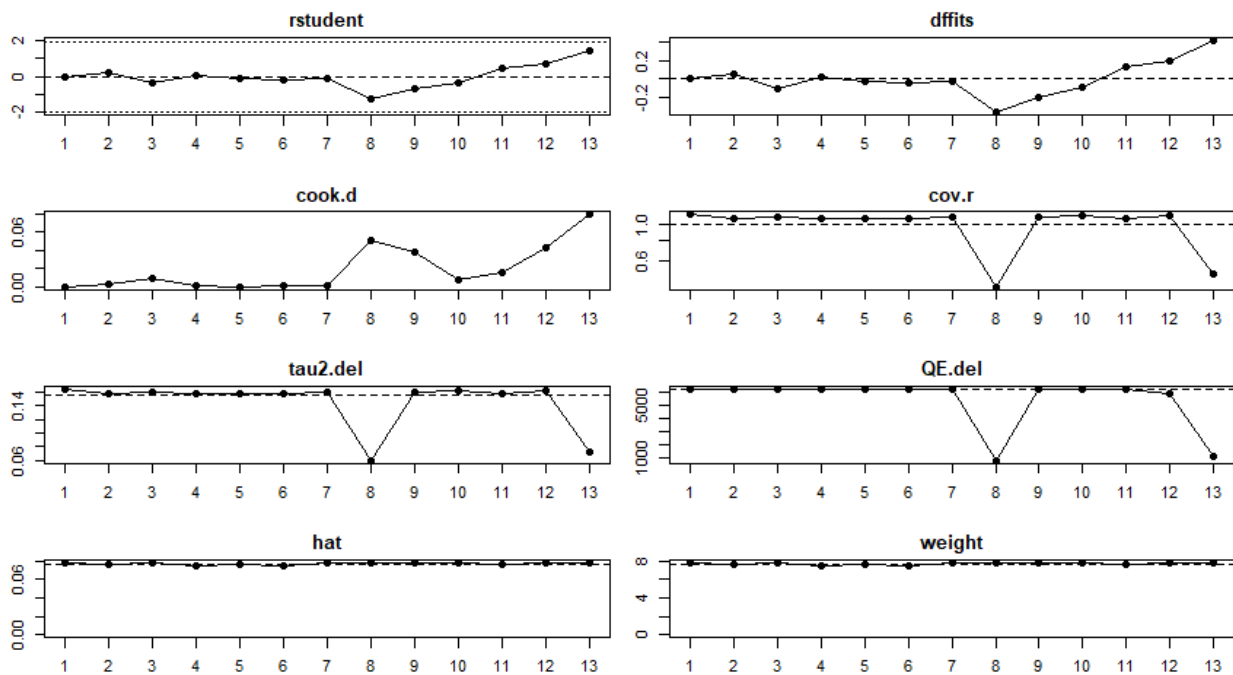

|    | rstudent | dffits  | cook.d | cov.r  | tau2.del | QE.del    | hat    | weight | dfbs    |
|----|----------|---------|--------|--------|----------|-----------|--------|--------|---------|
| 1  | -0.0024  | -0.0007 | 0.0000 | 1.1443 | 0.1652   | 6292.3141 | 0.0778 | 7.7794 | -0.0007 |
| 2  | 0.2049   | 0.0590  | 0.0035 | 1.0936 | 0.1579   | 6299.6025 | 0.0765 | 7.6528 | 0.0590  |
| 3  | -0.3412  | -0.0988 | 0.0100 | 1.1100 | 0.1602   | 6310.4223 | 0.0773 | 7.7349 | -0.0988 |
| 4  | 0.0720   | 0.0206  | 0.0004 | 1.0880 | 0.1573   | 6307.3667 | 0.0753 | 7.5329 | 0.0206  |
| 5  | -0.0592  | -0.0170 | 0.0003 | 1.0929 | 0.1579   | 6308.6725 | 0.0763 | 7.6253 | -0.0170 |
| 6  | -0.1545  | -0.0438 | 0.0019 | 1.0855 | 0.1571   | 6310.3779 | 0.0743 | 7.4326 | -0.0438 |
| 7  | -0.0917  | -0.0265 | 0.0007 | 1.1033 | 0.1593   | 6307.8732 | 0.0771 | 7.7124 | -0.0265 |
| 8  | -1.2193  | -0.3652 | 0.0508 | 0.4241 | 0.0596   | 800.7390  | 0.0781 | 7.8119 | -0.3609 |
| 9  | -0.6697  | -0.1940 | 0.0385 | 1.1106 | 0.1603   | 6295.1433 | 0.0774 | 7.7429 | -0.1940 |
| 10 | -0.3059  | -0.0887 | 0.0081 | 1.1203 | 0.1617   | 6310.6489 | 0.0776 | 7.7559 | -0.0887 |
| 11 | 0.4432   | 0.1273  | 0.0163 | 1.0892 | 0.1574   | 6291.1316 | 0.0761 | 7.6140 | 0.1272  |
| 12 | 0.7043   | 0.2047  | 0.0436 | 1.1282 | 0.1628   | 5882.4233 | 0.0780 | 7.7950 | 0.2048  |
| 13 | 1.4112   | 0.4173  | 0.0795 | 0.5047 | 0.0714   | 1082.9778 | 0.0781 | 7.8101 | 0.4137  |

inf

1  
2  
3  
4  
5  
6  
7  
8  
9  
10  
11  
12  
13

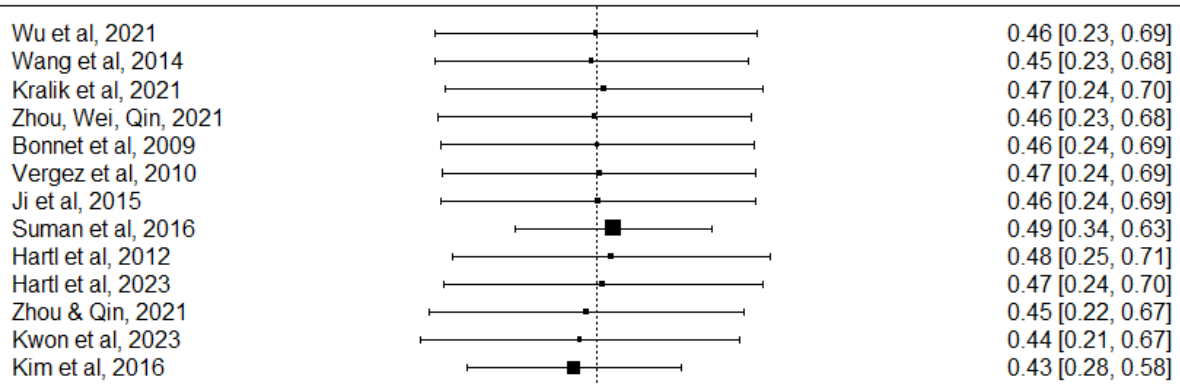

Summary proportions leaving out each study

|    | estimate | se       | zval   | pval   | ci.lb  | ci.ub  | Q         | Qp     | tau2   |
|----|----------|----------|--------|--------|--------|--------|-----------|--------|--------|
| 1  | 0.4605   | 0.1182   | 3.8944 | 0.0001 | 0.2287 | 0.6922 | 6292.3141 | 0.0000 | 0.1652 |
| 2  | 0.4538   | 0.1156   | 3.9264 | 0.0001 | 0.2273 | 0.6804 | 6299.6025 | 0.0000 | 0.1579 |
| 3  | 0.4714   | 0.1165   | 4.0483 | 0.0001 | 0.2432 | 0.6997 | 6310.4223 | 0.0000 | 0.1602 |
| 4  | 0.4581   | 0.1153   | 3.9734 | 0.0001 | 0.2321 | 0.6841 | 6307.3667 | 0.0000 | 0.1573 |
| 5  | 0.4623   | 0.1156   | 4.0006 | 0.0001 | 0.2358 | 0.6888 | 6308.6725 | 0.0000 | 0.1579 |
| 6  | 0.4653   | 0.1152   | 4.0400 | 0.0001 | 0.2395 | 0.6910 | 6310.3779 | 0.0000 | 0.1571 |
| 7  | 0.4634   | 0.1161   | 3.9909 | 0.0001 | 0.2358 | 0.6909 | 6307.8732 | 0.0000 | 0.1593 |
| 8  | 0.4853   | 0.0720   | 6.7419 | 0.0000 | 0.3442 | 0.6264 | 800.7390  | 0.0000 | 0.0596 |
| 9  | 0.4821   | 0.1165   | 4.1388 | 0.0000 | 0.2538 | 0.7104 | 6295.1433 | 0.0000 | 0.1603 |
| 10 | 0.4704   | 0.1170   | 4.0204 | 0.0001 | 0.2411 | 0.6997 | 6310.6489 | 0.0000 | 0.1617 |
| 11 | 0.4463   | 0.1154   | 3.8688 | 0.0001 | 0.2202 | 0.6724 | 6291.1316 | 0.0000 | 0.1574 |
| 12 | 0.4373   | 0.1174   | 3.7248 | 0.0002 | 0.2072 | 0.6674 | 5882.4233 | 0.0000 | 0.1628 |
| 13 | 0.4292   | 0.0785   | 5.4663 | 0.0000 | 0.2753 | 0.5831 | 1082.9778 | 0.0000 | 0.0714 |
|    | I2       | H2       |        |        |        |        |           |        |        |
| 1  | 99.8252  | 572.0286 |        |        |        |        |           |        |        |
| 2  | 99.8254  | 572.6911 |        |        |        |        |           |        |        |
| 3  | 99.8257  | 573.6748 |        |        |        |        |           |        |        |
| 4  | 99.8256  | 573.3970 |        |        |        |        |           |        |        |
| 5  | 99.8256  | 573.5157 |        |        |        |        |           |        |        |
| 6  | 99.8257  | 573.6707 |        |        |        |        |           |        |        |
| 7  | 99.8256  | 573.4430 |        |        |        |        |           |        |        |
| 8  | 98.6263  | 72.7945  |        |        |        |        |           |        |        |
| 9  | 99.8253  | 572.2858 |        |        |        |        |           |        |        |
| 10 | 99.8257  | 573.6954 |        |        |        |        |           |        |        |
| 11 | 99.8252  | 571.9211 |        |        |        |        |           |        |        |
| 12 | 99.8130  | 534.7658 |        |        |        |        |           |        |        |
| 13 | 98.9843  | 98.4525  |        |        |        |        |           |        |        |

2-4cm

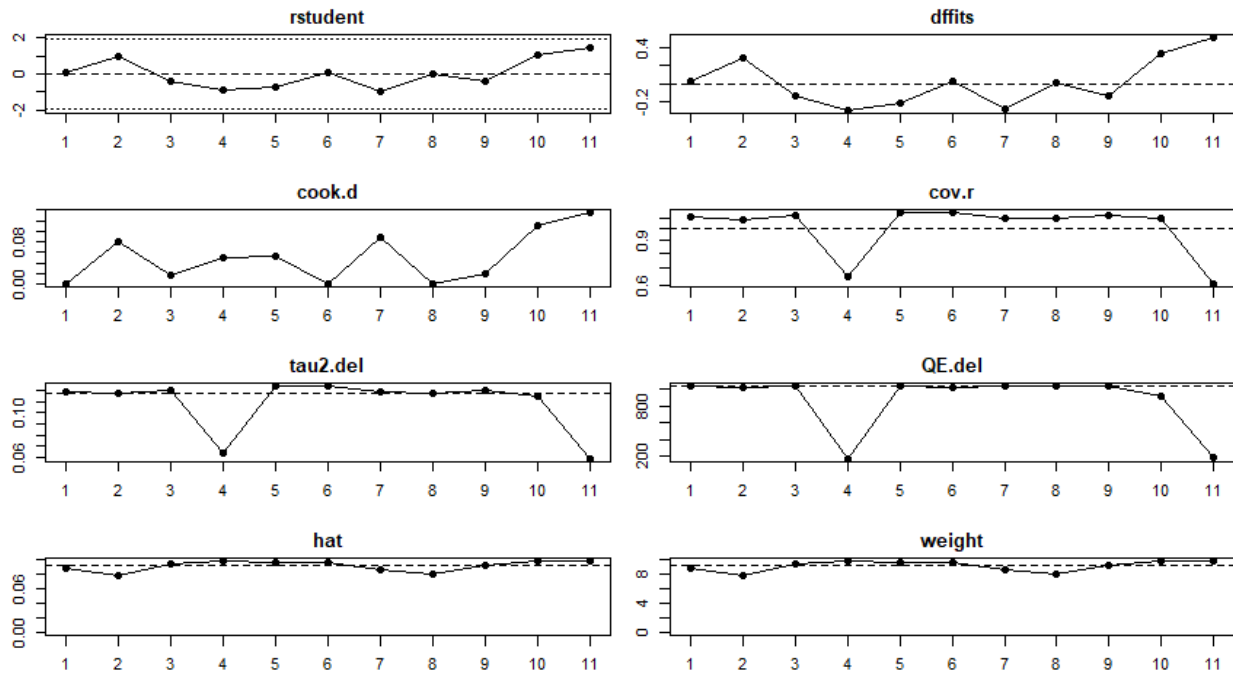

|    | rstudent | dffits  | cook.d | cov.r  | tau2.del | QE.del    | hat    | weight | dfbs    |
|----|----------|---------|--------|--------|----------|-----------|--------|--------|---------|
| 1  | 0.0903   | 0.0279  | 0.0008 | 1.1090 | 0.1184   | 1032.4457 | 0.0876 | 8.7615 | 0.0279  |
| 2  | 0.9740   | 0.2821  | 0.0795 | 1.0834 | 0.1168   | 1026.5953 | 0.0774 | 7.7407 | 0.2821  |
| 3  | -0.4093  | -0.1312 | 0.0177 | 1.1335 | 0.1204   | 1034.4956 | 0.0930 | 9.3030 | -0.1312 |
| 4  | -0.8595  | -0.2990 | 0.0490 | 0.6469 | 0.0641   | 172.4660  | 0.0986 | 9.8574 | -0.2909 |
| 5  | -0.6921  | -0.2248 | 0.0532 | 1.1623 | 0.1233   | 1032.1467 | 0.0956 | 9.5578 | -0.2250 |
| 6  | 0.0660   | 0.0211  | 0.0005 | 1.1661 | 0.1237   | 1025.9626 | 0.0960 | 9.5986 | 0.0211  |
| 7  | -0.9615  | -0.2941 | 0.0873 | 1.1037 | 0.1180   | 1032.3283 | 0.0854 | 8.5442 | -0.2940 |
| 8  | 0.0145   | 0.0042  | 0.0000 | 1.0944 | 0.1177   | 1033.7075 | 0.0799 | 7.9856 | 0.0042  |
| 9  | -0.4478  | -0.1419 | 0.0205 | 1.1225 | 0.1194   | 1034.4825 | 0.0910 | 9.1032 | -0.1419 |
| 10 | 1.0179   | 0.3342  | 0.1102 | 1.0937 | 0.1153   | 906.2757  | 0.0971 | 9.7131 | 0.3341  |
| 11 | 1.4630   | 0.5176  | 0.1363 | 0.6044 | 0.0593   | 191.3488  | 0.0983 | 9.8349 | 0.5019  |

inf  
1  
2  
3  
4  
5  
6  
7  
8  
9  
10  
11

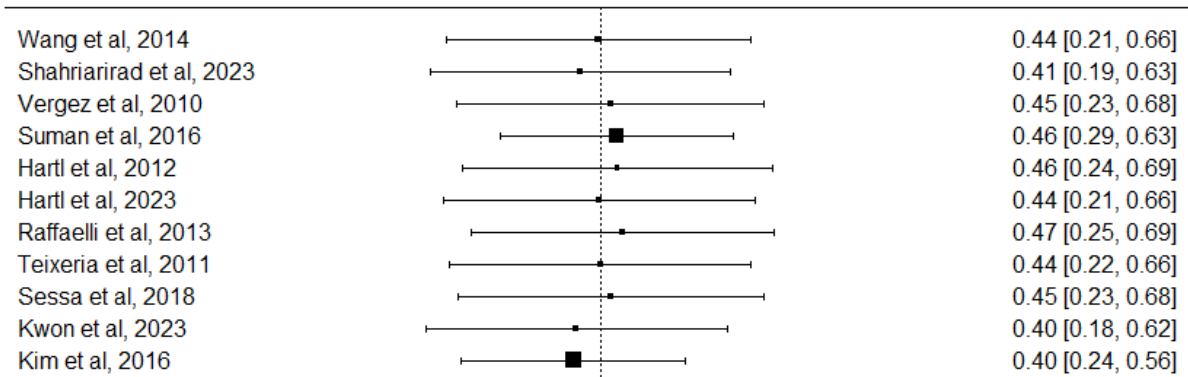

Summary proportions leaving out each study

|       | estimate | se       | zval   | pval   | ci.lb  | ci.ub  | Q         | Qp     | tau2   |
|-------|----------|----------|--------|--------|--------|--------|-----------|--------|--------|
| 1     | 0.4361   | 0.1130   | 3.8579 | 0.0001 | 0.2146 | 0.6577 | 1032.4457 | 0.0000 | 0.1184 |
| 2     | 0.4089   | 0.1117   | 3.6593 | 0.0003 | 0.1899 | 0.6278 | 1026.5953 | 0.0000 | 0.1168 |
| 3     | 0.4534   | 0.1143   | 3.9674 | 0.0001 | 0.2294 | 0.6774 | 1034.4956 | 0.0000 | 0.1204 |
| 4     | 0.4629   | 0.0863   | 5.3614 | 0.0000 | 0.2937 | 0.6321 | 172.4660  | 0.0000 | 0.0641 |
| 5     | 0.4639   | 0.1157   | 4.0086 | 0.0001 | 0.2371 | 0.6907 | 1032.1467 | 0.0000 | 0.1233 |
| 6     | 0.4368   | 0.1159   | 3.7682 | 0.0002 | 0.2096 | 0.6640 | 1025.9626 | 0.0000 | 0.1237 |
| 7     | 0.4708   | 0.1128   | 4.1752 | 0.0000 | 0.2498 | 0.6919 | 1032.3283 | 0.0000 | 0.1180 |
| 8     | 0.4387   | 0.1123   | 3.9063 | 0.0001 | 0.2186 | 0.6588 | 1033.7075 | 0.0000 | 0.1177 |
| 9     | 0.4545   | 0.1137   | 3.9964 | 0.0001 | 0.2316 | 0.6774 | 1034.4825 | 0.0000 | 0.1194 |
| 10    | 0.4035   | 0.1123   | 3.5941 | 0.0003 | 0.1835 | 0.6235 | 906.2757  | 0.0000 | 0.1153 |
| 11    | 0.3995   | 0.0835   | 4.7872 | 0.0000 | 0.2359 | 0.5631 | 191.3488  | 0.0000 | 0.0593 |
| I2 H2 |          |          |        |        |        |        |           |        |        |
| 1     | 99.1283  | 114.7162 |        |        |        |        |           |        |        |
| 2     | 99.1233  | 114.0661 |        |        |        |        |           |        |        |
| 3     | 99.1300  | 114.9440 |        |        |        |        |           |        |        |
| 4     | 94.7816  | 19.1629  |        |        |        |        |           |        |        |
| 5     | 99.1280  | 114.6830 |        |        |        |        |           |        |        |
| 6     | 99.1228  | 113.9958 |        |        |        |        |           |        |        |
| 7     | 99.1282  | 114.7031 |        |        |        |        |           |        |        |
| 8     | 99.1293  | 114.8564 |        |        |        |        |           |        |        |
| 9     | 99.1300  | 114.9425 |        |        |        |        |           |        |        |
| 10    | 99.0069  | 100.6973 |        |        |        |        |           |        |        |
| 11    | 95.2965  | 21.2610  |        |        |        |        |           |        |        |

Greater than 4cm

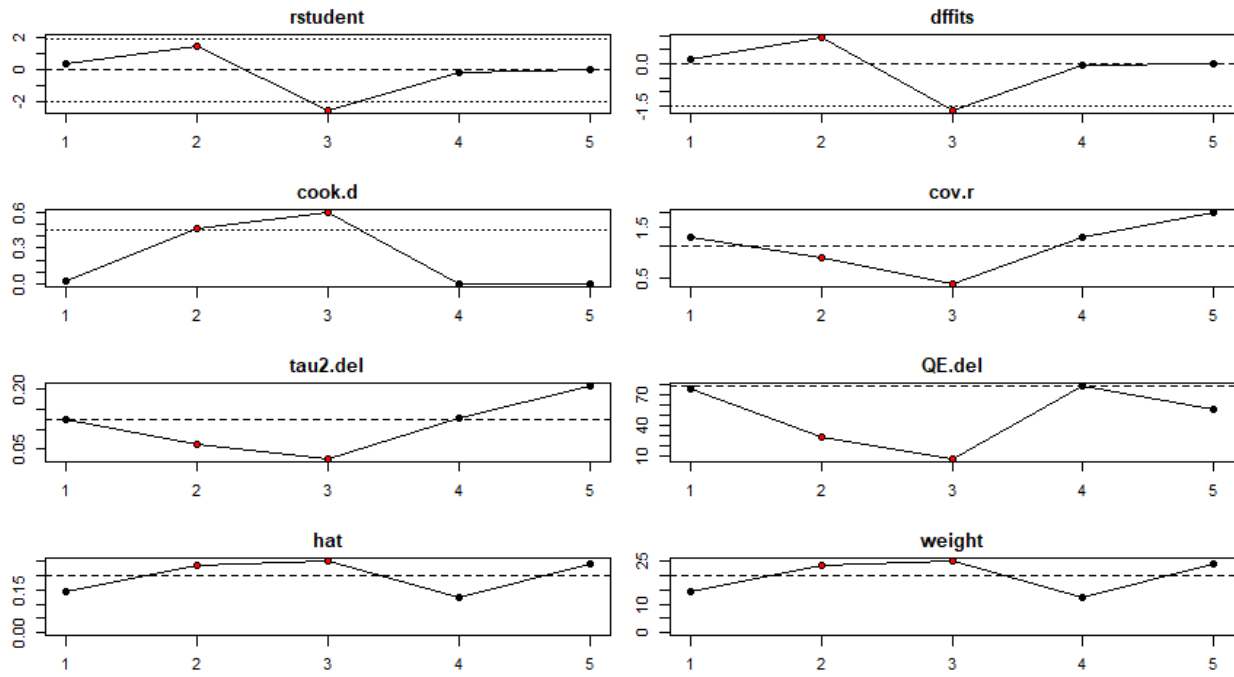


---

|   | rstudent | dffits  | cook.d | cov.r  | tau2.del | QE.del  | hat    | weight  | dfbs    |
|---|----------|---------|--------|--------|----------|---------|--------|---------|---------|
| 1 | 0.4039   | 0.1652  | 0.0274 | 1.1763 | 0.1236   | 75.9652 | 0.1435 | 14.3452 | 0.1650  |
| 2 | 1.4345   | 0.9190  | 0.4629 | 0.7656 | 0.0631   | 28.0583 | 0.2359 | 23.5851 | 0.8965  |
| 3 | -2.4747  | -1.6358 | 0.5989 | 0.4422 | 0.0273   | 7.5405  | 0.2529 | 25.2907 | -1.4251 |
| 4 | -0.1622  | -0.0640 | 0.0042 | 1.1756 | 0.1264   | 78.2808 | 0.1253 | 12.5345 | -0.0637 |
| 5 | -0.0064  | -0.0242 | 0.0010 | 2.0355 | 0.2064   | 55.8292 | 0.2424 | 24.2445 | -0.0248 |

inf  
1  
2 \*  
3 \*  
4  
5

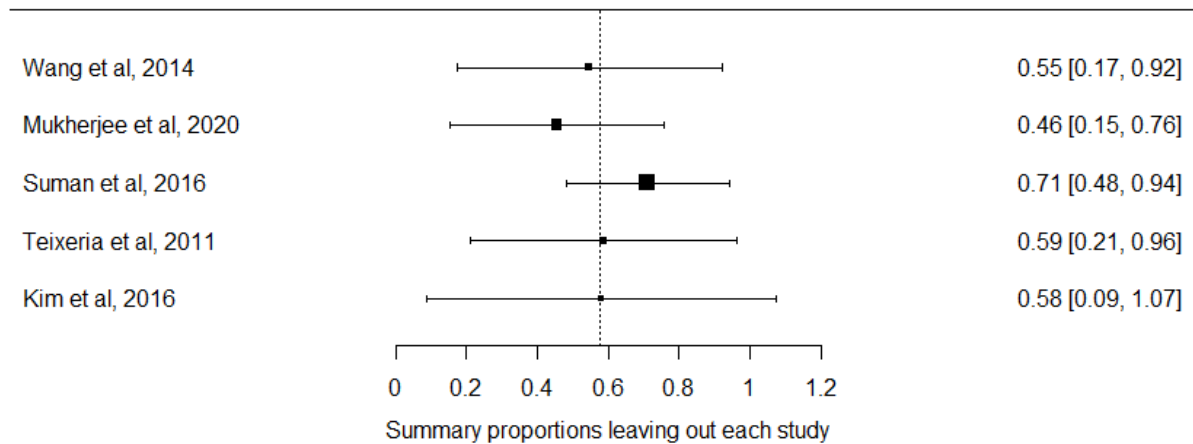

| estimate  | se      | zval   | pval   | ci.lb  | ci.ub  | Q       | Qp     | tau2   |
|-----------|---------|--------|--------|--------|--------|---------|--------|--------|
| 1 0.5465  | 0.1911  | 2.8603 | 0.0042 | 0.1720 | 0.9210 | 75.9652 | 0.0000 | 0.1236 |
| 2 0.4558  | 0.1541  | 2.9570 | 0.0031 | 0.1537 | 0.7579 | 28.0583 | 0.0000 | 0.0631 |
| 3 0.7120  | 0.1171  | 6.0779 | 0.0000 | 0.4824 | 0.9416 | 7.5405  | 0.0565 | 0.0273 |
| 4 0.5870  | 0.1910  | 3.0734 | 0.0021 | 0.2127 | 0.9614 | 78.2808 | 0.0000 | 0.1264 |
| 5 0.5811  | 0.2513  | 2.3122 | 0.0208 | 0.0885 | 1.0737 | 55.8292 | 0.0000 | 0.2064 |
| I2 H2     |         |        |        |        |        |         |        |        |
| 1 96.0508 | 25.3217 |        |        |        |        |         |        |        |
| 2 89.3080 | 9.3528  |        |        |        |        |         |        |        |
| 3 60.2150 | 2.5135  |        |        |        |        |         |        |        |
| 4 96.1676 | 26.0936 |        |        |        |        |         |        |        |
| 5 94.6265 | 18.6097 |        |        |        |        |         |        |        |
