# Supplementary material for: Prevalence of Occult Central Lymph Node Metastasis by Tumor Size in Papillary Thyroid Carcinoma: A Systematic Review and Meta-Analysis
Source: Curr Oncol. 2023 Aug 2;30(8):7335–50. doi: 10.3390/curroncol30080532 (PMC10453273; doi:10.3390/curroncol30080532)
Supplement: Supplementary file 1 [file curroncol-30-00532-s001.zip › Supplemental Figure 2 Funnel Egger.pdf]

## Supplemental Figure S2.

Funnel plots and Egger publication bias statistics outputs

Less than 5mm

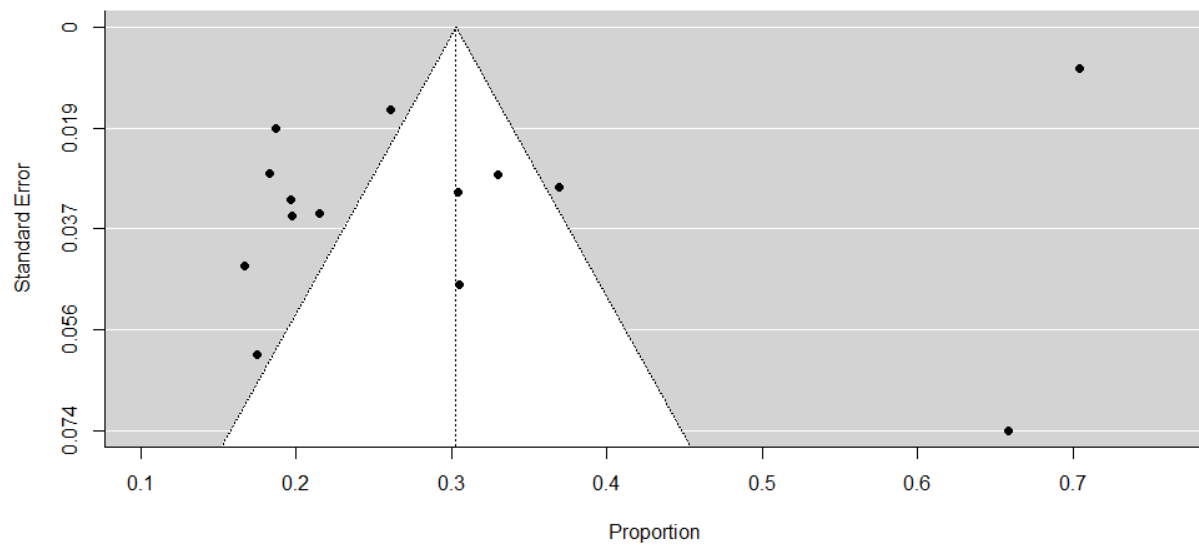

Regression Test for Funnel Plot Asymmetry

Model: mixed-effects meta-regression model  
Predictor: standard error

Test for Funnel Plot Asymmetry:  $z = 0.0719$ ,  $p = 0.9427$   
Limit Estimate (as  $se_i \rightarrow 0$ ):  $b = 0.2938$  (CI: 0.0274, 0.5603)

Less than 1cm

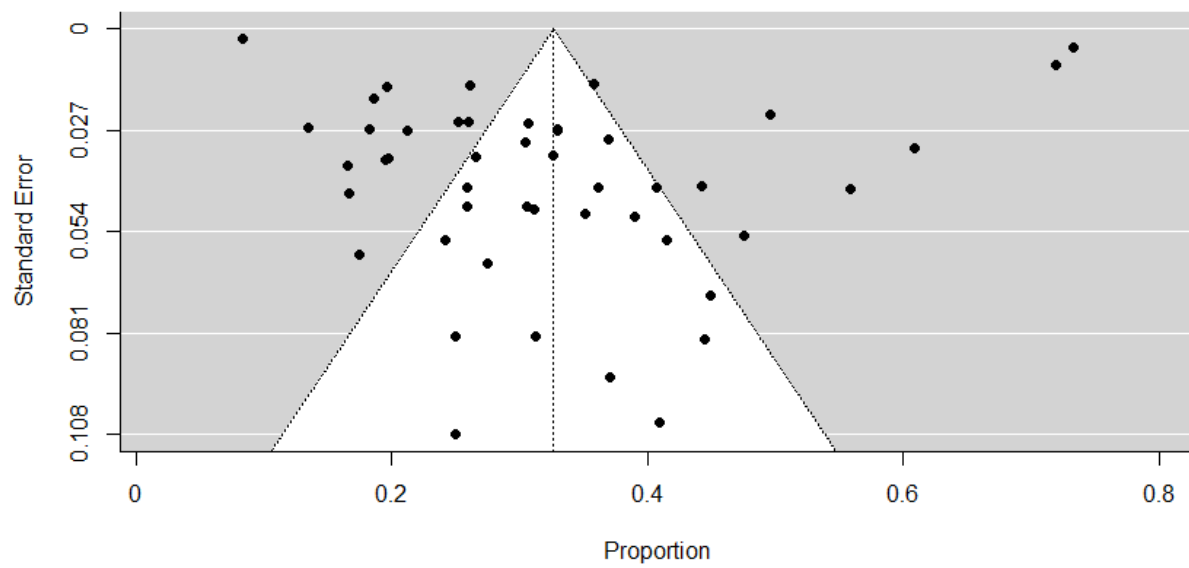

Regression Test for Funnel Plot Asymmetry

Model: mixed-effects meta-regression model

Predictor: standard error

Test for Funnel Plot Asymmetry:  $z = 0.0106$ ,  $p = 0.9915$

Limit Estimate (as  $se_i \rightarrow 0$ ):  $b = 0.3256$  (CI: 0.1206, 0.5307)

1-2cm

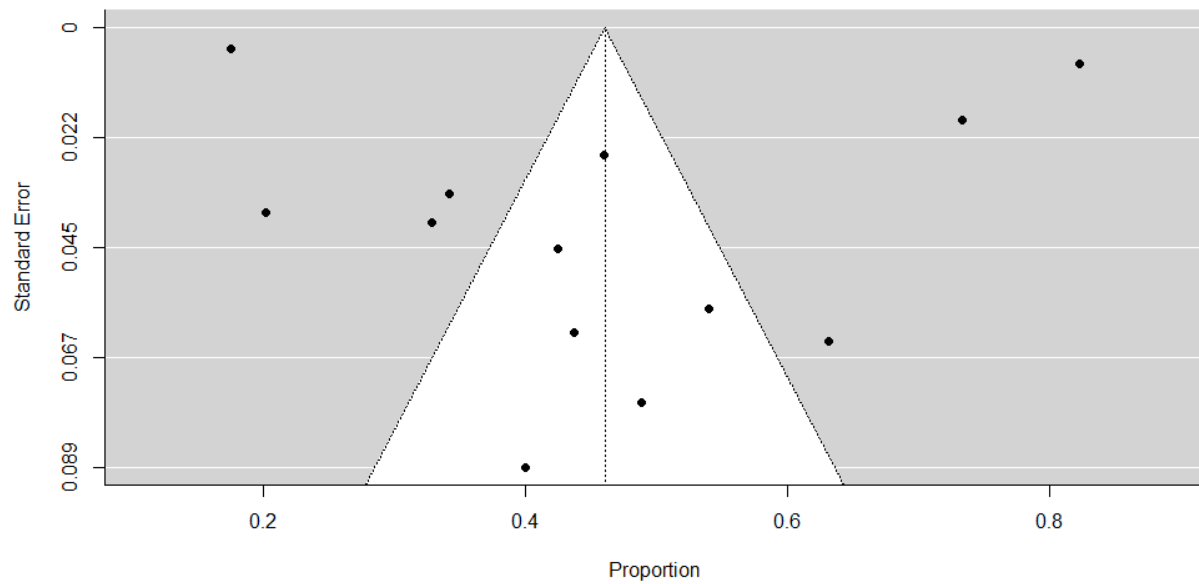

Regression Test for Funnel Plot Asymmetry

Model: mixed-effects meta-regression model

Predictor: standard error

Test for Funnel Plot Asymmetry:  $z = -0.0861$ ,  $p = 0.9314$

Limit Estimate (as  $se_i \rightarrow 0$ ):  $b = 0.4776$  (CI: 0.0261, 0.9290)

2-4cm

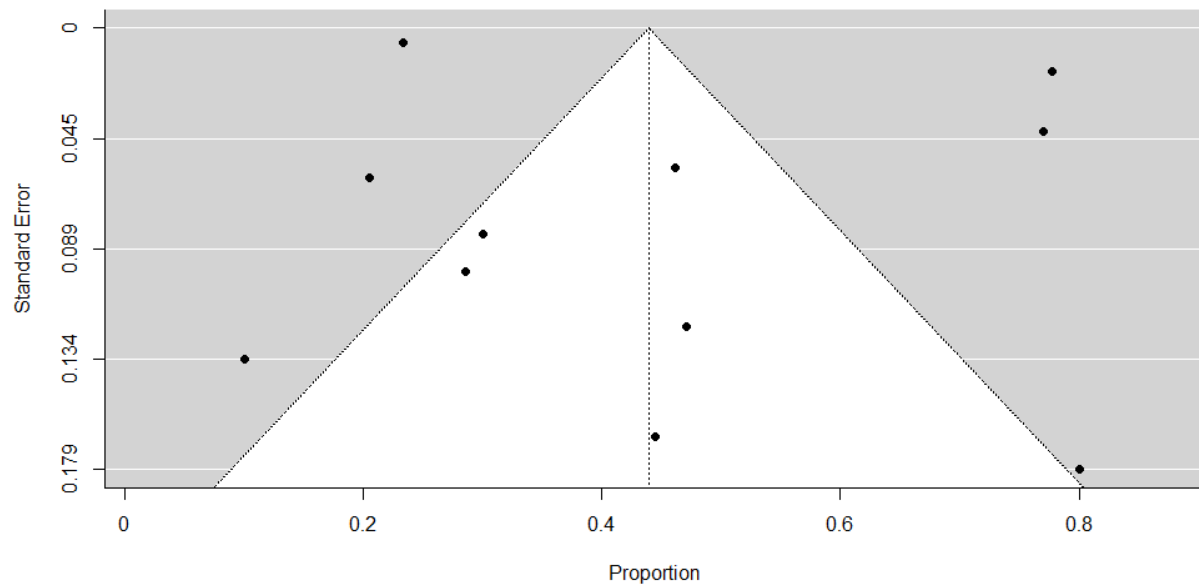

#### Regression Test for Funnel Plot Asymmetry

Model: mixed-effects meta-regression model  
Predictor: standard error

Test for Funnel Plot Asymmetry:  $z = -0.0544$ ,  $p = 0.9566$   
Limit Estimate (as  $se_i \rightarrow 0$ ):  $b = 0.4488$  (CI: 0.0393, 0.8582)

## Greater than 4cm

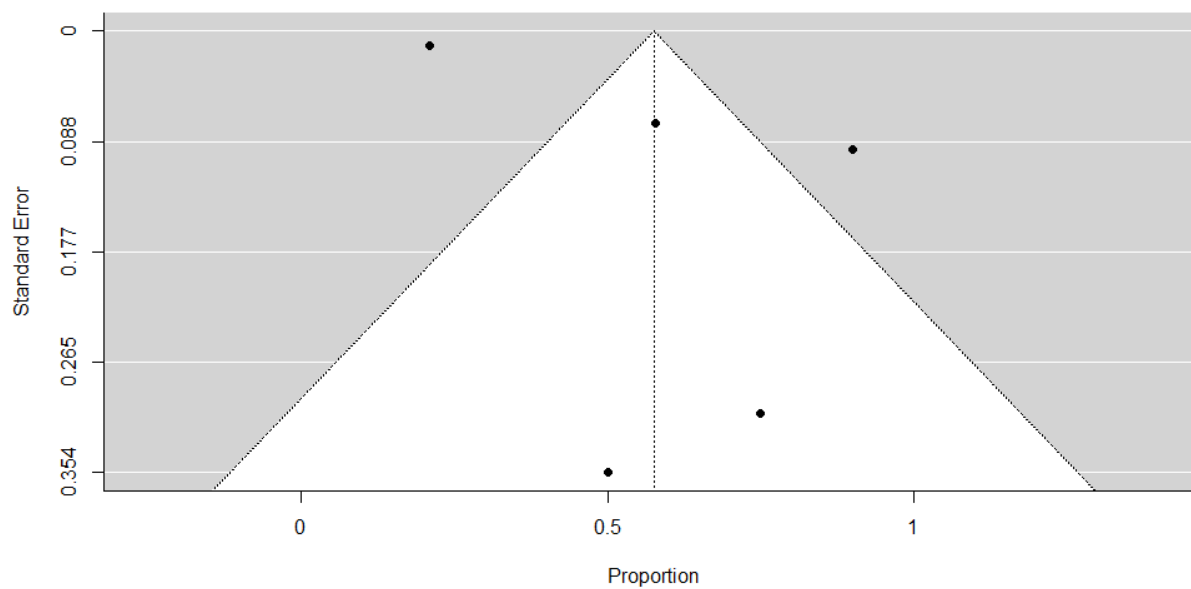

### Regression Test for Funnel Plot Asymmetry

Model: mixed-effects meta-regression model  
Predictor: standard error

Test for Funnel Plot Asymmetry:  $z = 0.6351$ ,  $p = 0.5253$   
Limit Estimate (as  $se_i \rightarrow 0$ ):  $b = 0.4752$  (CI: 0.0662, 0.8841)
